# Supplementary material
Source: MDPI journal article supplement (https://www.mdpi.com/2073-4352/11/10/1195)
Supplement: s1 [file s1]

To Supplementary data

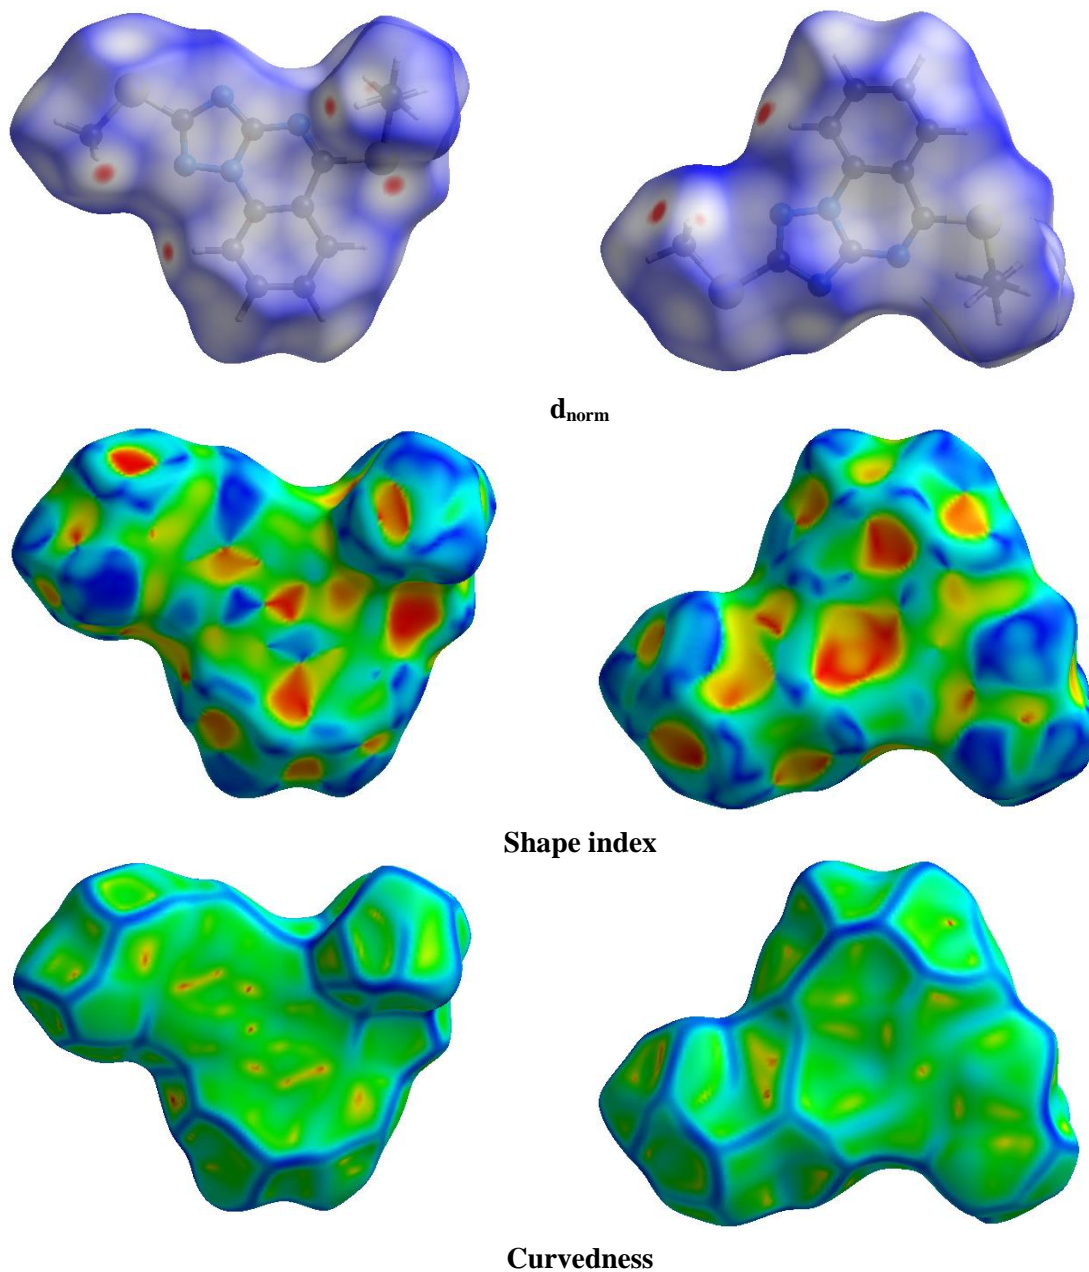

**Figure S1.** Hirshfeld analysis of CCDC 1827320.

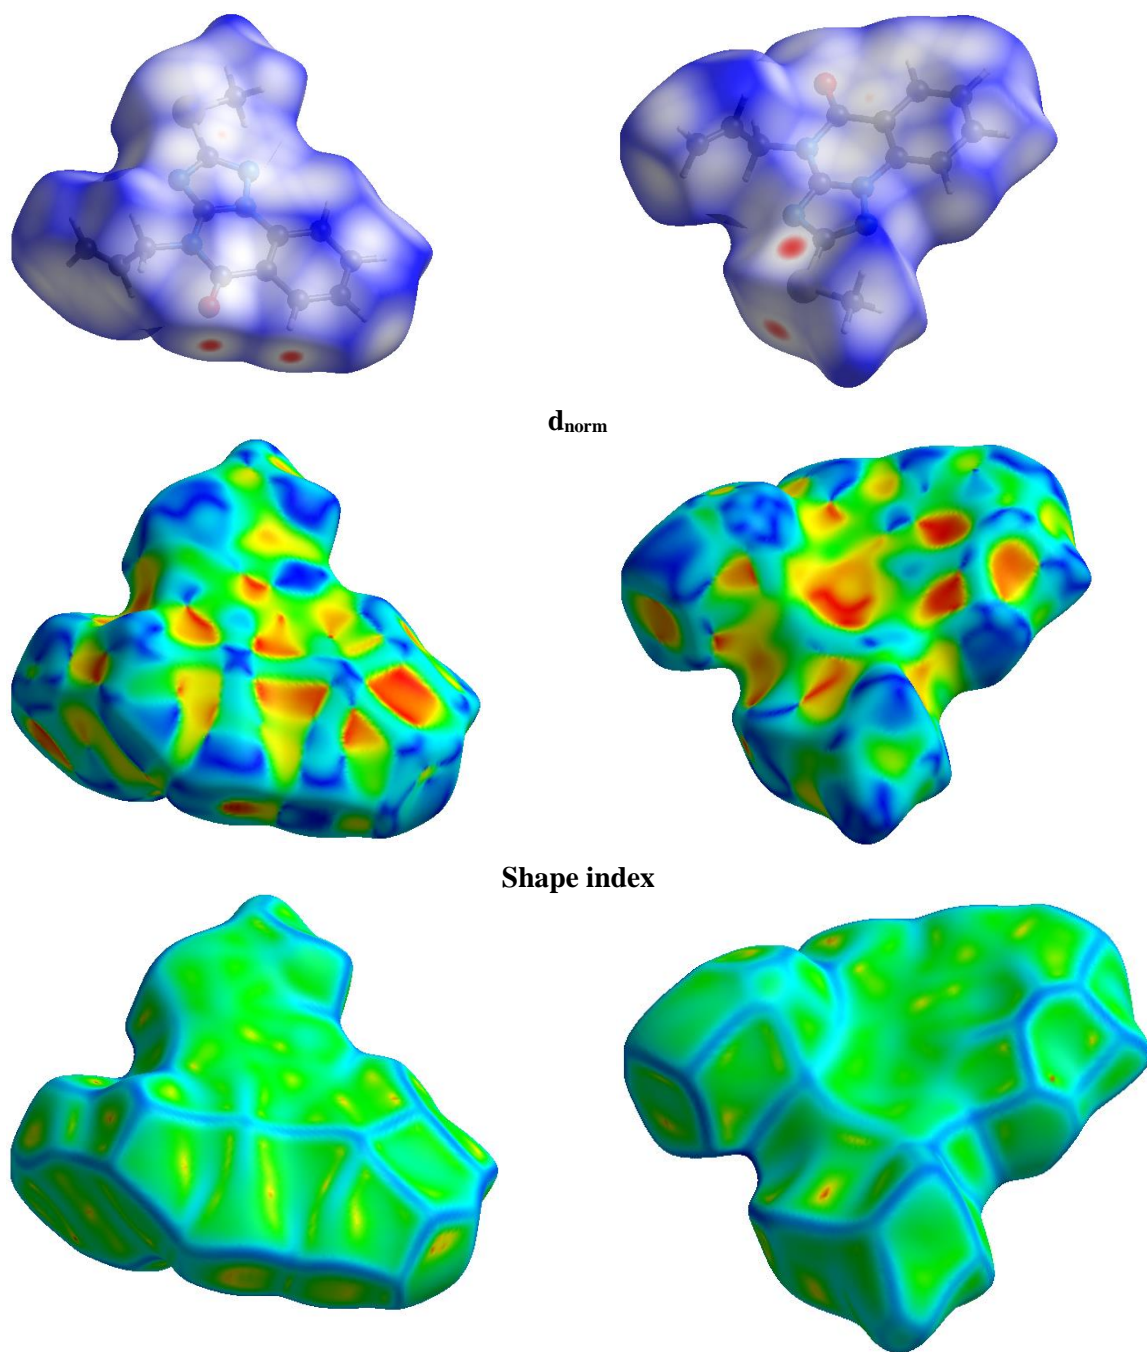

**Figure S2.** Hirshfeld analysis of CCDC 1826859.

**Table S1** The calculated bond distances of **1** and **2**

| <b>Bond (s)</b> | <b>Calc.</b> | <b>Exp.</b> | <b>Bond(s)</b> | <b>Calc.</b> | <b>Exp.</b> |
|-----------------|--------------|-------------|----------------|--------------|-------------|
| <b>1</b>        |              |             | <b>2</b>       |              |             |
| R(1-22)         | 1.756        | 1.734       | R(1-19)        | 1.757        | 1.741       |
| R(1-23)         | 1.825        | 1.786       | R(1-20)        | 1.825        | 1.789       |
| R(2-20)         | 1.218        | 1.219       | R(2-16)        | 1.776        | 1.751       |
| R(3-20)         | 1.404        | 1.399       | R(2-24)        | 1.838        | 1.809       |
| R(3-21)         | 1.370        | 1.369       | R(3-4)         | 1.363        | 1.379       |
| R(3-27)         | 1.481        | 1.468       | R(3-19)        | 1.333        | 1.325       |
| R(4-21)         | 1.316        | 1.318       | R(4-6)         | 1.377        | 1.383       |
| R(4-22)         | 1.370        | 1.370       | R(4-18)        | 1.38         | 1.369       |
| R(5-6)          | 1.377        | 1.387       | R(5-18)        | 1.324        | 1.314       |
| R(5-22)         | 1.322        | 1.328       | R(5-19)        | 1.358        | 1.363       |
| R(6-10)         | 1.388        | 1.384       | R(6-7)         | 1.401        | 1.324       |
| R(6-21)         | 1.361        | 1.337       | R(6-15)        | 1.416        | 1.407       |
| R(7-30)         | 1.328        | 1.236       | R(7-9)         | 1.381        | 1.317       |
| R(10-11)        | 1.397        | 1.385       | R(9-11)        | 1.405        | 1.39        |
| R(10-19)        | 1.406        | 1.403       | R(11-13)       | 1.381        | 1.371       |
| R(11-13)        | 1.387        | 1.372       | R(13-15)       | 1.409        | 1.395       |
| R(13-15)        | 1.401        | 1.376       | R(15-16)       | 1.457        | 1.451       |
| R(15-17)        | 1.386        | 1.366       | R(16-17)       | 1.304        | 1.305       |
| R(17-19)        | 1.400        | 1.394       | R(17-18)       | 1.353        | 1.363       |
| R(19-20)        | 1.482        | 1.470       | R(24-27)       | 1.524        | 1.51        |
| R(27-30)        | 1.505        | 1.510       |                |              |             |
| A(22-1-23)      | 100.047      | 100.941     | A(19-1-20)     | 100.259      | 101.765     |
| A(1-22-4)       | 119.496      | 117.583     | A(1-19-3)      | 123.661      | 123.903     |
| A(1-22-5)       | 124.251      | 126.137     | A(1-19-5)      | 119.811      | 119.094     |
| A(2-20-3)       | 120.54       | 120.366     | A(1-20-21)     | 105.664      | 109.5       |
| A(2-20-19)      | 123.763      | 123.895     | A(1-20-22)     | 110.652      | 109.485     |
| A(20-3-21)      | 121.757      | 121.406     | A(1-20-23)     | 110.708      | 109.498     |
| A(20-3-27)      | 119.212      | 120.593     | A(16-2-24)     | 101.742      | 101.655     |
| A(3-20-19)      | 115.697      | 115.739     | A(2-16-15)     | 117.68       | 116.74      |
| A(21-3-27)      | 119.009      | 117.754     | A(2-16-17)     | 118.752      | 119.663     |
| A(3-21-4)       | 128.537      | 127.078     | A(2-24-25)     | 103.413      | 109.058     |

|             |         |         |             |         |         |
|-------------|---------|---------|-------------|---------|---------|
| A(3-21-6)   | 120.565 | 120.946 | A(2-24-26)  | 106.797 | 109.052 |
| A(3-27-30)  | 112.158 | 110.664 | A(2-24-27)  | 114.018 | 112.635 |
| A(21-4-22)  | 102.094 | 101.508 | A(4-3-19)   | 101.219 | 100.518 |
| A(4-21-6)   | 110.894 | 111.964 | A(3-4-6)    | 127.217 | 127.306 |
| A(4-22-5)   | 116.253 | 116.256 | A(3-4-18)   | 110.068 | 109.869 |
| A(6-5-22)   | 101.49  | 100.883 | A(3-19-5)   | 116.528 | 117.002 |
| A(5-6-10)   | 126.83  | 126.562 | A(6-4-18)   | 122.714 | 122.567 |
| A(5-6-21)   | 109.269 | 109.38  | A(4-6-7)    | 122.362 | 119.285 |
| A(10-6-21)  | 123.892 | 123.987 | A(4-6-15)   | 116.083 | 115.419 |
| A(6-10-11)  | 122.435 | 122.625 | A(4-18-5)   | 109.423 | 110.193 |
| A(6-10-19)  | 116.304 | 116.255 | A(4-18-17)  | 121.897 | 122.661 |
| A(7-30-27)  | 123.581 | 125.554 | A(18-5-19)  | 102.762 | 102.416 |
| A(11-10-19) | 121.262 | 121.119 | A(5-18-17)  | 128.681 | 127.144 |
| A(10-11-13) | 118.649 | 118.969 | A(7-6-15)   | 121.556 | 125.291 |
| A(10-19-17) | 118.816 | 118.041 | A(6-7-9)    | 118.836 | 116.219 |
| A(10-19-20) | 121.779 | 121.607 | A(6-15-13)  | 117.828 | 116.188 |
| A(11-13-15) | 121.007 | 120.75  | A(6-15-16)  | 117.595 | 118.619 |
| A(13-15-17) | 119.905 | 120.698 | A(7-9-11)   | 120.81  | 124.364 |
| A(15-17-19) | 120.361 | 120.422 | A(9-11-13)  | 120.215 | 118.666 |
| A(17-19-20) | 119.404 | 120.337 | A(11-13-15) | 120.756 | 119.248 |
|             |         |         | A(13-15-16) | 124.577 | 125.172 |
|             |         |         | A(15-16-17) | 123.566 | 123.549 |
|             |         |         | A(16-17-18) | 118.144 | 117.064 |

**Table S2** Natural charge populations at the different atomic sites of the studied compounds.

| Atom | Charge  | Atom | Charge  |
|------|---------|------|---------|
| 1    |         | 2    |         |
| S 1  | 0.2773  | S 1  | 0.2771  |
| O 2  | -0.6098 | S 2  | 0.2477  |
| N 3  | -0.4489 | N 3  | -0.3809 |
| N 4  | -0.5709 | N 4  | -0.1986 |
| N 5  | -0.3800 | N 5  | -0.5299 |
| N 6  | -0.2105 | C 6  | 0.2051  |
| C 7  | -0.3408 | C 7  | -0.2141 |
| H 8  | 0.1869  | H 8  | 0.2337  |
| H 9  | 0.1884  | C 9  | -0.1545 |
| C 10 | 0.1916  | H 10 | 0.2081  |
| C 11 | -0.2191 | C 11 | -0.2064 |
| H 12 | 0.2322  | H 12 | 0.2094  |
| C 13 | -0.1537 | C 13 | -0.1537 |
| H 14 | 0.2070  | H 14 | 0.2195  |
| C 15 | -0.2120 | C 15 | -0.1445 |
| H 16 | 0.2087  | C 16 | 0.1579  |
| C 17 | -0.1350 | N 17 | -0.5208 |
| H 18 | 0.2292  | C 18 | 0.5649  |
| C 19 | -0.1653 | C 19 | 0.2337  |
| C 20 | 0.6855  | C 20 | -0.6846 |
| C 21 | 0.6028  | H 21 | 0.2132  |
| C 22 | 0.2380  | H 22 | 0.2092  |
| C 23 | -0.6828 | H 23 | 0.2094  |
| H 24 | 0.2141  | C 24 | -0.4678 |
| H 25 | 0.2107  | H 25 | 0.2089  |
| H 26 | 0.2103  | H 26 | 0.2288  |
| C 27 | -0.2036 | C 27 | -0.5773 |
| H 28 | 0.2207  | H 28 | 0.2021  |
| H 29 | 0.2246  | H 29 | 0.1938  |
| C 30 | -0.1942 | H 30 | 0.2105  |
| H 31 | 0.1988  |      |         |

**Table S3** The calculated and experimental chemical shifts (ppm) for **1** (according to figure 6)

| Atom | (C.S) <sub>calc</sub> | (C.S) <sub>exp</sub> | Atom | (C.S) <sub>calc</sub> | (C.S) <sub>exp</sub> |
|------|-----------------------|----------------------|------|-----------------------|----------------------|
| C 7  | 126.000               | 112.25               | H 24 | 2.370                 | 2.65                 |
| C 10 | 141.687               | 138.14               | H 25 | 2.752                 | 2.65                 |
| C 11 | 119.810               | 131.33               | H 26 | 2.752                 | 2.65                 |
| C 13 | 142.130               | 129.21               | H 8  | 5.864                 | 5.31                 |
| C 15 | 131.393               | 117.23               | H 9  | 5.595                 | 5.31                 |
| C 17 | 135.594               | 127.60               | H 12 | 8.173                 | 8.26                 |
| C 19 | 120.973               | 114.90               | H 14 | 8.097                 | 7.75                 |
| C 20 | 164.484               | 167.32               | H 16 | 7.746                 | 7.51                 |
| C 21 | 156.463               | 145.72               | H 18 | 8.574                 | 7.77                 |
| C 22 | 173.225               | 154.43               | H 28 | 4.489                 | 4.80                 |
| C 23 | 20.181                | 13.90                | H 29 | 5.173                 | 5.31                 |
| C 27 | 51.554                | 45.50                | H 31 | 6.346                 | 6.00                 |
| C 30 | 140.334               | 133.17               |      |                       |                      |

**Table S4** The calculated and experimental chemical shifts (ppm) for **2** (according to the Fig. 6)

| Atom | (C.S) <sub>calc</sub> | (C.S) <sub>exp</sub> | Atom | (C.S) <sub>calc</sub> | (C.S) <sub>exp</sub> |
|------|-----------------------|----------------------|------|-----------------------|----------------------|
| C 6  | 139.981               | 133.73               | H 8  | 8.496                 | 8.22                 |
| C 7  | 120.594               | 115.55               | H 10 | 8.229                 | 8.22                 |
| C 9  | 141.741               | 135.95               | H 12 | 7.842                 | 7.69                 |
| C 11 | 131.483               | 126.78               | H 14 | 8.484                 | 8.08                 |
| C 13 | 131.589               | 126.01               | H 21 | 2.402                 | 2.69                 |
| C 15 | 122.754               | 117.50               | H 22 | 2.807                 | 2.69                 |
| C 16 | 177.517               | 167.69               | H 23 | 2.821                 | 2.69                 |
| C 18 | 158.454               | 152.73               | H 25 | 2.987                 | 4.80                 |
| C 19 | 175.310               | 164.61               | H 26 | 3.946                 | 4.80                 |
| C 20 | 19.963                | 14.44                | H 28 | 1.463                 | 1.42                 |
| C 24 | 34.677                | 24.48                | H 29 | 1.217                 | 1.42                 |
| C 27 | 16.574                | 13.97                | H 30 | 1.593                 | 1.42                 |
